# Supplementary material for: Land use conversion from peat swamp forest to oil palm agriculture greatly modifies microclimate and soil conditions
Source: PeerJ. 2019 Oct 14;7:e7656. doi: 10.7717/peerj.7656 (PMC6796957; doi:10.7717/peerj.7656)
Supplement: Supplemental Information 1 [file peerj-07-7656-s001.xlsx]

## Sheet: Data
Habitat	Visit	HUMIDITY	SURR. TEMP	SURF. TEM.W/O TEM	SURF.TEM.W TEMP	SOIL PH	SOIL MOIST	AVG.WIND SPEED	AVG. LIGHT LUX
Forest	1	70.3	30.1	27.9	29.4	5.2	9	0	314
Forest	1	69.2	31.2	28.6	29.7	4.7	8	0.4	273
Forest	1	72.2	30.2	28	28.6	4.5	8.9	0	293
Forest	1	79.4	30.2	28	27.6	4.6	9	0	287
Forest	1	81	31.1	28.3	29	6.7	9	0	293
Forest	1	81.4	30	27.8	27.9	5.9	10.9	0	293
Forest	1	81.8	31	27.7	27.8	6.9	10.1	0	278
Forest	1	83.3	32.3	27	27.4	6.2	10	0	101
Forest	1	82.5	30.4	27	26.9	6.3	8.9	0	120
Forest	1	79.3	30.1	27.9	28	6.3	4.2	0	123
Forest	1	77.3	31.2	27.5	26.7	4.1	9.7	0	122
Forest	1	82	30.2	27.1	26.2	3.4	7.5	0	145
Forest	1	84.2	30.3	26.4	26.9	5.9	10.5	0	167
Forest	1	72.2	30.2	27.5	27	6.3	10	0	234
Forest	1	74.5	30.4	29.4	28.3	6.3	10.2	0	235
Forest	1	77.2	30.3	28.1	26.4	6.2	9.2	0	198
Forest	1	76.4	30.1	28.2	28.1	4.1	10	0	205
Forest	1	79.1	30.6	27.1	28.3	6.2	10.2	0	293
Forest	1	80.2	30.7	28.1	27.1	6.1	10.1	0	183
Forest	1	79.3	31.2	27.3	28.4	4.8	10.2	0	245
Forest	1	78.2	32.3	28	28.5	5.6	10	0.2	234
Forest	1	80.4	31.9	28	27.4	3.2	10	0	191
Forest	1	81.3	29	27.3	29.3	5.3	10	0	123
Forest	1	79.7	29.1	28.3	27.4	6.9	9.2	0	187
Forest	1	77.4	30.1	28.3	29.7	6.7	9.3	0	198
Forest	1	78.3	31.1	27.3	27.4	6	9.4	0	287
Forest	1	79.3	32.2	28.8	27.8	6.4	9.9	0.1	273
Forest	1	82.1	29.4	27.7	27.4	6.9	10.2	0	178
Forest	1	83.4	29	27	27.4	4.8	9.8	0	111
Forest	1	77.2	31	27.9	28.3	6.5	10	0	256
Forest	2	71.3	30.2	28.4	29.4	5.1	9	0	356
Forest	2	69.2	31.2	28.6	29.7	4.7	8	0.4	273
Forest	2	72.2	30.2	28	28.6	4.5	8.9	0	293
Forest	2	79.4	30.2	28	27.6	4.6	9	0	287
Forest	2	81	31.1	28.3	29	6.7	9	0	293
Forest	2	81.4	30	27.8	27.9	5.9	10.9	0	293
Forest	2	81.8	31	27.7	27.8	6.9	10.1	0	278
Forest	2	83.3	32.3	27	27.4	6.2	10	0	101
Forest	2	82.5	30.4	27	26.9	6.3	10	0	120
Forest	2	79.3	30.1	27.9	28	6.3	4.2	0	123
Forest	2	77.3	31.2	27.5	27.3	4.5	9.7	0	122
Forest	2	82	30.2	27.1	26.2	3.9	10	0	145
Forest	2	84.2	30.3	27.1	26.9	5.9	10.5	0	157
Forest	2	72.2	30.2	27.5	27	6.3	10	0	234
Forest	2	74.5	30.4	29.4	28.3	6.3	10.2	0	213
Forest	2	77.2	30.3	28.1	27.4	6.2	10	0	198
Forest	2	76.4	30.1	28.2	28.1	4.1	10	0	205
Forest	2	79.1	30.6	27.1	28.3	6.2	10.2	0	293
Forest	2	80.2	30.7	28.1	27.1	6.9	10.1	0	183
Forest	2	79.3	31.2	27.3	28.4	4.8	10.2	0	194
Forest	2	78.2	32.3	28	28.5	5.6	10	0	234
Forest	2	80.4	31.9	28	27.4	3.9	10	0	189
Forest	2	81.3	29	27.3	29.3	5.3	10	0	123
Forest	2	79.7	29.1	28.3	27.4	6.9	10.3	0	231
Forest	2	77.4	30.1	28.3	29.7	6.7	9.3	0	198
Forest	2	78.3	31.1	27.3	27.4	6	9.4	0	287
Forest	2	79.3	32.2	28.8	27.8	6.4	9.9	0.1	273
Forest	2	82.1	29.4	27.7	27.4	6.1	10.2	0	178
Forest	2	83.4	29	27	27.4	4.8	9.8	0	111
Forest	2	77.2	31	27.9	28.3	6.5	10	0	256
Forest	3	70.2	30.1	29.3	28.4	4.5	9	0.2	178
Forest	3	72.2	30.2	28	28.6	4.5	8.9	0	293
Forest	3	79.4	30.2	28	27.6	4.6	9	0	287
Forest	3	81	31.1	28.3	29	6.7	9	0	293
Forest	3	81.4	30	27.8	27.9	5.9	10.9	0	293
Forest	3	81.8	31	27.7	27.8	6.9	10.1	0	278
Forest	3	83.3	32.3	27	27.4	6.2	10	0	101
Forest	3	82.5	30.4	27	26.9	6.3	8.9	0	120
Forest	3	79.3	30.1	27.9	28	6.3	4.2	0	123
Forest	3	77.3	31.2	27.5	27.3	4.1	9.7	0	122
Forest	3	82	30.2	27.1	26.2	3.4	7.5	0	145
Forest	3	84.2	30.3	27.1	26.9	5.9	10.5	0	167
Forest	3	72.2	30.2	27.5	27	6.3	10	0	234
Forest	3	74.5	30.4	29.4	28.3	6.3	10.2	0	235
Forest	3	77.2	30.3	28.1	27.4	6.2	9.2	0	198
Forest	3	76.4	30.1	28.2	28.1	4.1	10	0	205
Forest	3	79.1	30.6	27.1	28.3	6.2	10.2	0	293
Forest	3	80.2	30.7	28.1	27.1	6.1	10.1	0	183
Forest	3	79.3	31.2	27.3	28.4	4.8	10.2	0	245
Forest	3	78.2	32.3	28	28.5	5.6	10	0.2	234
Forest	3	80.4	31.9	28	27.4	3.2	10	0	191
Forest	3	81.3	29	27.3	29.3	5.3	10	0	123
Forest	3	79.7	29.1	28.3	27.4	6.9	9.2	0	187
Forest	3	77.4	30.1	28.3	29.7	6.7	9.3	0	198
Forest	3	78.3	31.1	27.3	27.4	6	9.4	0	287
Forest	3	79.3	32.2	28.8	27.8	6.4	9.9	0.1	273
Forest	3	82.1	29.4	27.7	27.4	6.9	10.2	0	178
Forest	3	83.4	29	27	27.4	4.8	9.8	0	111
Forest	3	77.2	31	27.9	28.3	6.5	10	0	256
Forest	3	71.3	30.2	28.4	29.4	5.1	9	0	356
Plantation	1	58.1	36.7	30.1	30.1	6.2	9.8	0.4	893
Plantation	1	59.2	36.2	31.1	31	6.3	5.6	0.2	843
Plantation	1	56.2	34.2	30.2	30.2	6	5.7	0.1	1012
Plantation	1	56.1	35.4	30.2	30	6	8.4	0.2	1013
Plantation	1	58.2	36.6	30.1	30	6.5	7.8	0	876
Plantation	1	59.3	34.5	30.2	30	6	7.8	0	856
Plantation	1	59.6	37.4	30.2	30	6.7	8.3	0	845
Plantation	1	60.2	30.1	29.1	30	5.6	6.7	0	854
Plantation	1	61.2	29	29	28.9	5.6	7.9	0	856
Plantation	1	60.2	31	30	29.9	6.8	4.2	0.1	854
Plantation	1	56.3	38.1	30	28.9	6.1	4.9	0.2	1020
Plantation	1	58.4	37.2	31.3	30.9	6.9	5.9	0	876
Plantation	1	58.5	36.2	35.3	35.1	7.2	4.8	0	765
Plantation	1	58.7	37.8	35.6	35.2	6.1	6.8	0	567
Plantation	1	59.8	37.5	34.5	34.4	7.5	7	0	874
Plantation	1	69.3	34.2	32.1	32	7.5	8.9	0	653
Plantation	1	68.4	35.2	31.2	31.2	6	4.8	0	783
Plantation	1	67.9	31.1	30.1	30.1	5.9	5.8	0	784
Plantation	1	56.7	37.4	36.3	36.1	5.2	4.7	0.2	1018
Plantation	1	67.1	31.2	29.1	29	5.9	4	0.2	533
Plantation	1	71.2	30.1	29	29	6	4.9	0	520
Plantation	1	58.4	35.6	34.4	33.9	6.7	4.8	0	874
Plantation	1	59.5	34.5	33.2	32.8	6.3	5.2	0	812
Plantation	1	60.4	32.6	31.3	30.9	5.8	5.4	0	530
Plantation	1	62.4	33.7	33.7	32.6	5.1	5.6	0	509
Plantation	1	65.4	31	30.4	30	5.6	4.5	0	508
Plantation	1	56.7	34.5	33.9	32.9	5.9	5.2	0.2	1001
Plantation	1	59.7	35.6	32.3	31.2	6.4	4.7	0	765
Plantation	1	59.7	35.6	33.9	33	6.1	4.8	0.1	789
Plantation	1	60.3	31.9	30.2	29.3	6.5	4.9	0.1	543
Plantation	2	58.2	36.4	30.2	30.1	6.2	9.8	0.2	899
Plantation	2	59.3	31.2	31.1	31.1	6.2	5.6	0	842
Plantation	2	57	30	32.2	30.2	6.1	5.8	0.1	992
Plantation	2	56.1	30.5	30.1	31.1	6.1	8.3	0.1	1003
Plantation	2	57.9	30.1	31.2	29.9	6.5	7.8	0	879
Plantation	2	59.2	30.1	30.2	30	6.1	7.8	0	756
Plantation	2	60.1	30.2	30.1	30.1	6.7	8.2	0	854
Plantation	2	60.2	30.1	29.8	28.9	5.5	6.7	0	854
Plantation	2	59.9	29.5	31.2	31.9	5.6	7.9	0	704
Plantation	2	59.9	30	32.1	30.1	6.8	4.3	0	798
Plantation	2	57.7	30.1	29.8	30.9	6.1	4.8	0	1010
Plantation	2	55.7	32.7	35.3	36.8	6.8	5.8	0.2	798
Plantation	2	68.3	34.5	35.2	35.2	7.2	4.7	0.1	828
Plantation	2	68.3	35.7	35.2	55.4	6.1	5.9	0	583
Plantation	2	68.9	35.6	34.3	32.3	7.5	4.7	0	923
Plantation	2	68.3	32.1	32.1	32.2	7.4	4.2	0	702
Plantation	2	66.9	31.2	31.2	32.1	6.1	4.8	0	811
Plantation	2	56.7	30.7	33.2	36.7	5.9	4.8	0	823
Plantation	2	67.9	35.4	37.1	30.2	5	5.2	0.3	928
Plantation	2	70.8	30	30.2	31.4	6.1	5.4	0.3	448
Plantation	2	58.7	31.2	31.1	29	6.1	5.6	0.1	518
Plantation	2	60.2	33.4	33.4	31.9	6.7	4.5	0.1	881
Plantation	2	60.2	33.9	32.3	33.7	6.2	5.2	0.2	623
Plantation	2	60.2	32.4	32.3	31.8	5.9	4.7	0.1	508
Plantation	2	64.3	33.7	34.7	32.6	5.2	4.8	0	508
Plantation	2	56.5	31.2	30.4	29.7	5.6	4.9	0	1021
Plantation	2	59.5	32.9	33.9	31.9	5.9	5	0.1	881
Plantation	2	60.2	33.4	31.3	32.3	6.3	5.2	0.2	912
Plantation	2	59.6	32.7	34.9	33.4	6.2	4.3	0.1	1012
Plantation	2	59.2	33.9	33.9	32.3	6.1	4.1	0.1	918
Plantation	3	58.4	35.3	32	30.3	6.1	9.7	0	878
Plantation	3	58.9	31.3	31.2	31	6.1	5.6	0.2	844
Plantation	3	56.9	30	32.2	32.1	6.2	5.8	0.1	1020
Plantation	3	56.2	30	38.9	32.1	6	8.2	0.1	932
Plantation	3	60.1	30	37.1	30.5	6.5	7.9	0.1	889
Plantation	3	59	30.1	30.2	30.1	6.1	8.4	0.2	877
Plantation	3	62.1	30.2	32.3	30	6.7	6.7	0	843
Plantation	3	60.2	29.8	33.4	32.3	5.7	7.9	0	798
Plantation	3	61.5	32.2	31.2	28.9	5.5	4.2	0	855
Plantation	3	60.1	30.5	32.3	32.9	6.8	4.7	0	718
Plantation	3	58.1	29.9	33.9	32.3	6.2	5.8	0	998
Plantation	3	61.3	32.2	32.2	30.9	6.3	4.8	0	854
Plantation	3	56.6	30.5	32.8	36.8	7.2	4.9	0.2	889
Plantation	3	57.6	29.9	32.9	36.3	6.2	4.9	0.1	654
Plantation	3	69.3	32.2	35.1	36.3	7.4	4.2	0.1	828
Plantation	3	59.3	32.8	31.2	32.4	7.3	4.7	0.1	753
Plantation	3	66.4	34.5	31.2	32.1	6.1	4.8	0.2	812
Plantation	3	57.7	35.6	30.2	36.6	5.8	5.1	0.2	856
Plantation	3	68.9	35.6	32.3	30.2	5.2	5.4	0	987
Plantation	3	70.9	33.2	32.3	33.4	6.1	5.6	0	498
Plantation	3	49.2	30.7	32.3	30.3	6.1	4.5	0	554
Plantation	3	59.3	36.4	35.2	30	6.7	5.2	0.1	928
Plantation	3	59.3	30.1	28.9	32.3	6.2	4.7	0	889
Plantation	3	62.4	29.9	31.2	30.8	5.9	4.8	0.1	456
Plantation	3	65.9	32.9	33.1	31.6	5.8	4.9	0	524
Plantation	3	57.7	33.9	30.1	30.6	5.7	5.2	0.2	532
Plantation	3	60.2	30.1	36.9	32.9	5.8	5.2	0	984
Plantation	3	60.1	33.6	37.2	31.2	6.3	5.2	0	880
Plantation	3	61.2	30.1	35.2	32.4	6.2	4.3	0.3	920
Plantation	3	59.8	32.9	35.2	33.4	6	4.7	0	1006
Smallholding	1	58.4	32.1	32	30	4.8	6	0	692
Smallholding	1	59.1	32	32	31	5.6	4.5	0.2	789
Smallholding	1	59.1	33	33	32.6	5.6	5.6	0.3	674
Smallholding	1	56.2	32.1	31.3	31	5.6	5.4	0.9	910
Smallholding	1	57.1	33.2	31.3	31.3	6.2	4.9	0	1017
Smallholding	1	59.3	31.2	30.2	30.1	4.6	5.9	0.2	673
Smallholding	1	60.2	30.3	30	31.2	6.7	4.9	0.4	564
Smallholding	1	61.3	32.1	31.2	30.2	5.7	6	0.5	523
Smallholding	1	57.5	32.1	31.4	31.5	5.9	6.3	0	629
Smallholding	1	58.4	31.2	30	29	4.6	4.6	0	560
Smallholding	1	69	29.5	28.5	29.4	6.3	5.7	0.1	478
Smallholding	1	54.5	31.3	30.9	31.2	5.7	4.9	0	1005
Smallholding	1	56.4	30.3	30.2	30.2	5.6	4.8	0.2	931
Smallholding	1	55.6	31.2	31	30.9	4.6	4.3	0.1	1112
Smallholding	1	59.6	32.5	32.5	32.4	4.3	5.6	0.2	501
Smallholding	1	53.4	34.5	34.3	34.9	6.8	4.7	0	1203
Smallholding	1	66.7	28.9	29	29	6.5	3.5	0.2	517
Smallholding	1	56.4	33.2	33.1	32.9	5.7	7.5	0	521
Smallholding	1	59.1	34.2	33.1	33	5.7	6.9	0	654
Smallholding	1	61.3	31.4	30	29.3	6.8	4.6	0	421
Smallholding	1	59.6	34.5	33.9	32.6	6.3	5.6	0.1	572
Smallholding	1	62.5	29.9	29	31.3	6.4	5.1	0.2	517
Smallholding	1	65.7	29.9	29.4	30.4	6.7	4	0	562
Smallholding	1	56.7	34.5	34.5	33.4	6.8	5.6	0	715
Smallholding	1	57.2	34.3	34.2	32.6	6.9	4.9	0.2	691
Smallholding	1	68.4	29.9	29.7	30.5	5.6	5.9	0.1	563
Smallholding	1	58.7	33.2	33.1	32.3	4.6	5.6	0.2	872
Smallholding	1	56.8	31.2	29	29.1	5.8	7.4	0.2	845
Smallholding	1	55.4	36.7	35.6	34.3	6.9	5.6	0	1104
Smallholding	1	62.4	28.9	29	28.2	5.8	4.8	0.4	534
Smallholding	2	58.9	32.1	32.3	31	4.9	5	0	567
Smallholding	2	60.1	32.2	31.9	31	5.5	4.5	0.2	771
Smallholding	2	60.4	33.3	32.1	31.6	5.6	5.5	0.2	814
Smallholding	2	58.8	33.4	31.3	30.1	6.2	5.3	0.2	991
Smallholding	2	58.8	32.3	32.3	31.2	4.6	4.9	0.3	995
Smallholding	2	60.2	32.4	29.8	29.9	6.7	4.9	0.4	537
Smallholding	2	61.3	32.1	29.7	31.7	6.2	4.9	0.4	645
Smallholding	2	60.2	32.4	30.3	29.8	5.7	6.1	0	625
Smallholding	2	61.3	33.3	30.9	32.1	5.8	4.3	0	924
Smallholding	2	60.3	32.9	32.1	28.7	4.6	4.6	0	665
Smallholding	2	59.5	29.5	30.5	30.2	6.3	4.7	0.5	452
Smallholding	2	60.5	30.1	31.9	32.2	5.6	4.9	0.6	987
Smallholding	2	60.7	31.5	32.3	31.9	5.7	4.7	0	953
Smallholding	2	55.6	29.7	31.3	31.4	4.7	4.5	0	1004
Smallholding	2	55.4	34.6	33.5	34.9	4.2	5.6	0	553
Smallholding	2	56.6	32.1	33.3	33.9	6.8	4.7	0.3	1119
Smallholding	2	60.1	32.1	30.2	29.8	6.4	4.5	0.2	615
Smallholding	2	52.3	33.4	32.1	32.9	5.6	7.2	0.1	533
Smallholding	2	67.8	33.2	33.1	33.2	5.6	5.7	0	546
Smallholding	2	62.3	32.9	30.8	29.6	6.7	4.6	0	458
Smallholding	2	59.6	30.2	32.8	36.6	6.2	5.3	0.2	567
Smallholding	2	62.5	31.4	30.9	31.8	6.3	5.6	0	587
Smallholding	2	64.8	31.8	31.4	30.4	6.6	4.2	0	536
Smallholding	2	58.7	32.4	34.5	33.4	6.7	5.3	0.1	815
Smallholding	2	60.1	33.4	34.2	32.6	6.8	4.8	0	692
Smallholding	2	69.4	30.5	30.7	30.5	5.7	5.1	0.3	553
Smallholding	2	60.2	32.3	33.1	31.3	4.7	5.4	0	837
Smallholding	2	56.8	32.1	32.1	31.3	5.9	6.3	0.2	854
Smallholding	2	55.4	35.8	35.6	33.3	6.8	5.4	0.1	1008
Smallholding	2	62.4	31.9	30.1	28.4	5.7	4.4	0.2	583
Smallholding	3	59.7	33.1	33.2	29.8	4.9	4.7	0.2	682
Smallholding	3	61.2	32.1	29.2	29.8	5.4	3.5	0.1	771
Smallholding	3	60.4	32.4	31.2	32.2	5.3	7.4	0.1	672
Smallholding	3	57.9	32.2	32.2	33.1	5.4	6.8	0.2	891
Smallholding	3	58.9	32.9	30.8	29.7	6.1	5.7	0.3	1010
Smallholding	3	61.3	30.2	32.8	31.8	6.4	5.4	0	670
Smallholding	3	60.9	31.3	30.8	29.8	4.3	4.2	0	568
Smallholding	3	60.5	29.1	31.2	30.8	6.4	4.3	0.4	543
Smallholding	3	62.7	32.1	33.5	32.4	5.9	5.7	0.3	657
Smallholding	3	61.6	32.1	34.3	33.2	4.3	5.2	0.2	663
Smallholding	3	59.5	29.5	30.7	30.2	6.2	5.3	0.4	571
Smallholding	3	57.5	31.4	32.9	31.8	5.8	4.9	0.4	1112
Smallholding	3	58.8	31.4	30.4	29.5	5.6	5.4	0.2	1103
Smallholding	3	61.2	31.2	30.1	30.1	4.7	5.3	0.1	617
Smallholding	3	52.8	31.5	31.4	31.4	4.5	5	0.3	1132
Smallholding	3	68.9	34.6	33.6	32.5	6.7	4.8	0.2	653
Smallholding	3	59.2	29.1	32.1	31.2	6.4	6.2	0.2	1019
Smallholding	3	61.2	32.2	31.2	32.2	6.2	4.3	0.1	705
Smallholding	3	59.9	33.2	33.2	32.1	5.8	5.8	0	433
Smallholding	3	57.7	31.3	31.3	29.3	6.7	5.8	0	432
Smallholding	3	56.4	33.4	32.4	33.2	6.4	5.2	0.3	422
Smallholding	3	60.4	30.2	29.3	29.3	6.3	4.9	0	431
Smallholding	3	62.5	31.2	32.2	32.2	6.6	4.9	0	431
Smallholding	3	56.6	32.3	32.4	30	6.7	6.1	0.1	414
Smallholding	3	62.1	32.2	31.8	32.8	6.9	6.3	0.2	452
Smallholding	3	57.8	30.1	29.8	30.1	5.6	4.7	0.3	523
Smallholding	3	56.6	32.1	30.7	30.7	4.6	5.6	0.2	432
Smallholding	3	55.4	30.1	29.4	30.1	5.8	5.9	0.3	453
Smallholding	3	61.2	34.8	35.1	35.3	6.9	5.4	0.2	632
Smallholding	3	61.2	33.4	34.1	32.9	5.8	5.5	0.3	837

## Sheet: Sheet2
Habitat	Visit
Forest	1
Forest	1
Forest	1
Forest	1
Forest	1
Forest	1
Forest	1
Forest	1
Forest	1
Forest	1
Forest	1
Forest	1
Forest	1
Forest	1
Forest	1
Forest	1
Forest	1
Forest	1
Forest	1
Forest	1
Forest	1
Forest	1
Forest	1
Forest	1
Forest	1
Forest	1
Forest	1
Forest	1
Forest	1
Forest	1
Plantation	1
Plantation	1
Plantation	1
Plantation	1
Plantation	1
Plantation	1
Plantation	1
Plantation	1
Plantation	1
Plantation	1
Plantation	1
Plantation	1
Plantation	1
Plantation	1
Plantation	1
Plantation	1
Plantation	1
Plantation	1
Plantation	1
Plantation	1
Plantation	1
Plantation	1
Plantation	1
Plantation	1
Plantation	1
Plantation	1
Plantation	1
Plantation	1
Plantation	1
Plantation	1
Smallholding	1
Smallholding	1
Smallholding	1
Smallholding	1
Smallholding	1
Smallholding	1
Smallholding	1
Smallholding	1
Smallholding	1
Smallholding	1
Smallholding	1
Smallholding	1
Smallholding	1
Smallholding	1
Smallholding	1
Smallholding	1
Smallholding	1
Smallholding	1
Smallholding	1
Smallholding	1
Smallholding	1
Smallholding	1
Smallholding	1
Smallholding	1
Smallholding	1
Smallholding	1
Smallholding	1
Smallholding	1
Smallholding	1
Smallholding	1
